# Supplementary material for: Osteoclasts adapt to physioxia perturbation through DNA demethylation
Source: PubMed Central journal article supplement — EMBO Rep. 2021 Oct 18;22(12):e53035. doi: 10.15252/embr.202153035 (PMC8647016; doi:10.15252/embr.202153035), 2021-10-18
Supplement: EMBR-22-e53035-s001.pdf [file EMBR-22-e53035-s001.pdf]

## Expanded View Figures

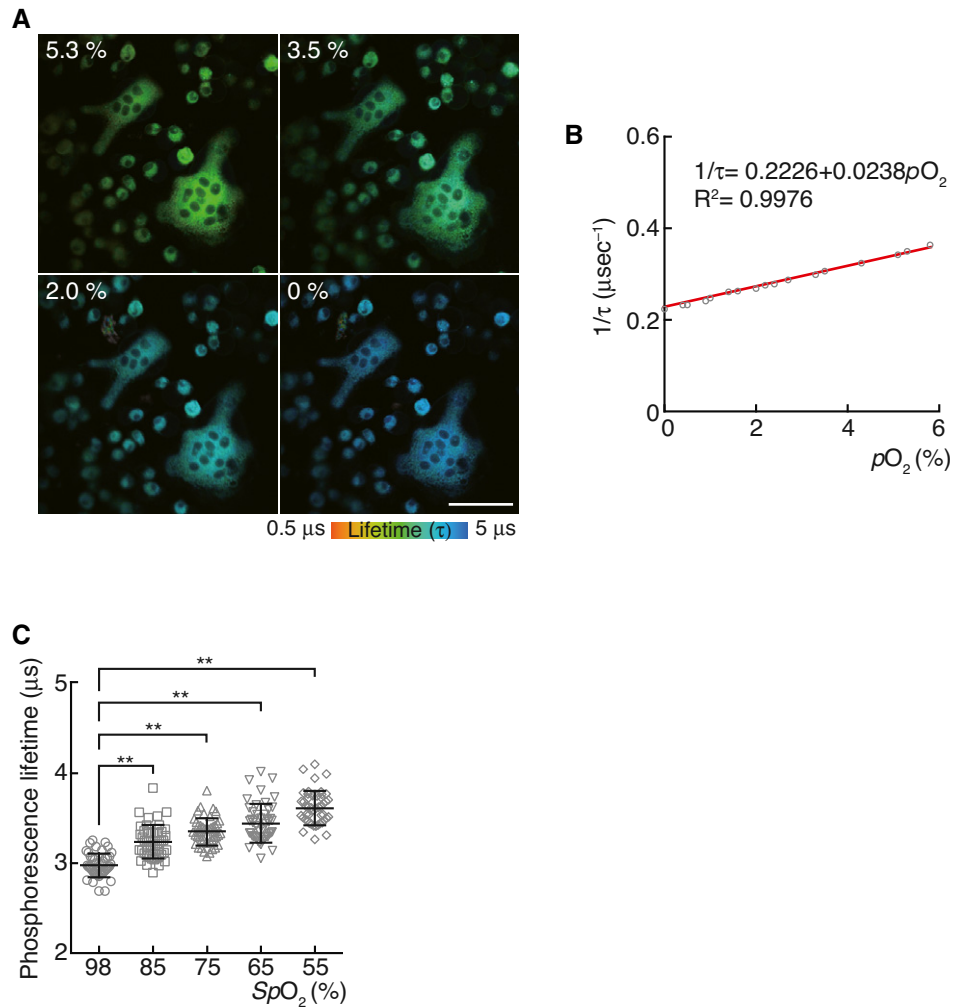

**Figure EV1. Reciprocal plot of phosphorescence lifetime and oxygen concentration.**

- A PLIM images of *in vitro*-cultured osteoclasts under different conditions of oxygen concentration. Scale, 50  $\mu\text{m}$ .
- B The phosphorescence quenching due to dissolved oxygen in solution can be examined by the Stern–Volmer equation. The approximate line was constructed by a straight-line approximation, and an approximation formula and the coefficient of determination are shown.
- C Phosphorescence lifetime in each osteoclast of the calvarial bone marrow of mice upon inhalation of normal (21%  $pO_2$ ) and hypoxic (14%  $pO_2$ ) air. The phosphorescence lifetime of each osteoclast was plotted (right,  $n = 47$  from three mice for each  $SpO_2$ ). Data denote mean  $\pm$  s.e.m. **\*\*** $P < 0.01$  (ANOVA).

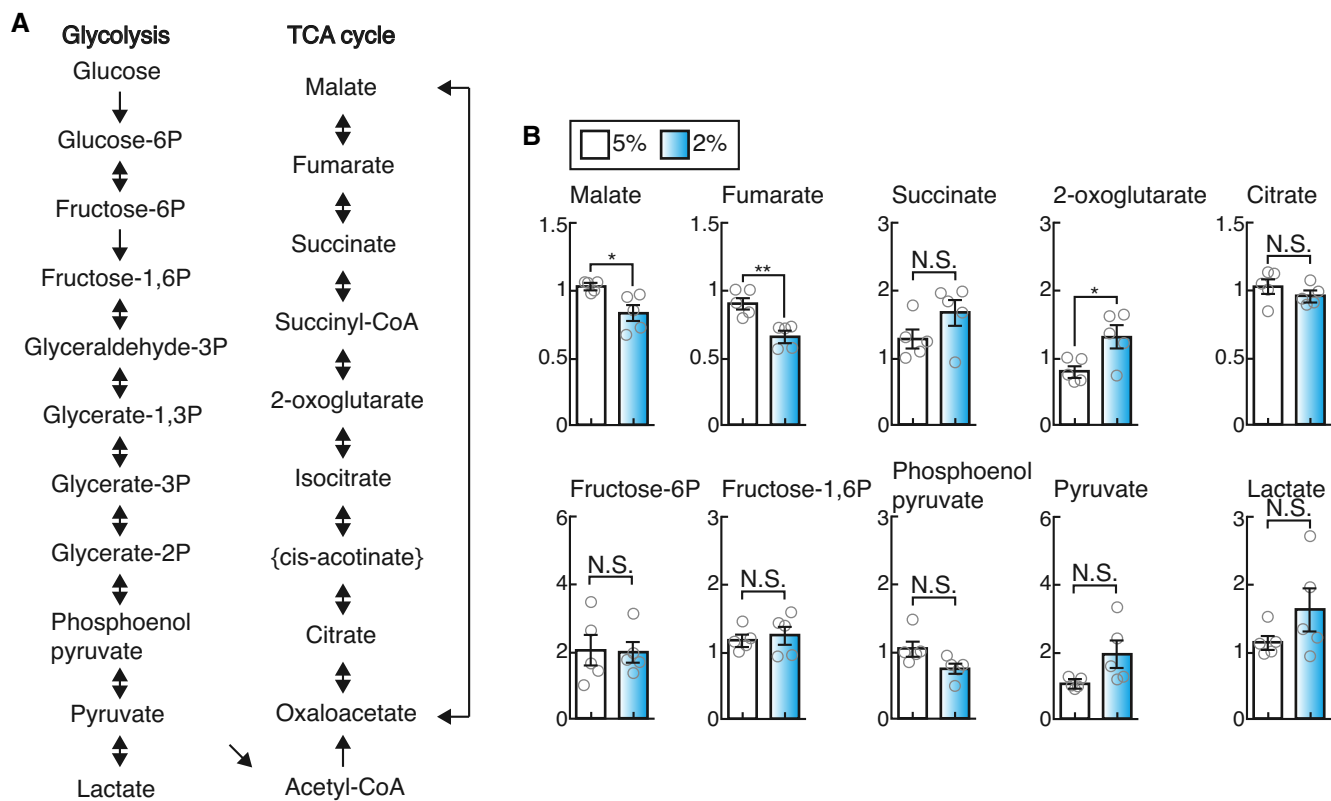

**Figure EV2. Effect of physioxia and hypoxia on the levels of metabolites.**

A Metabolites involved in glycolysis and the TCA cycle.

B Levels of metabolites involved in glycolysis and the TCA cycle. BMMs were cultured with 50 ng/ml RANKL in the presence of 10 ng/ml M-CSF for 2 days under 5% and 2% oxygen. Data denote mean  $\pm$  s.e.m. \* $P < 0.05$ ; \*\* $P < 0.01$ ; NS, not significant ( $n = 5$  biological replicates;  $t$ -test).

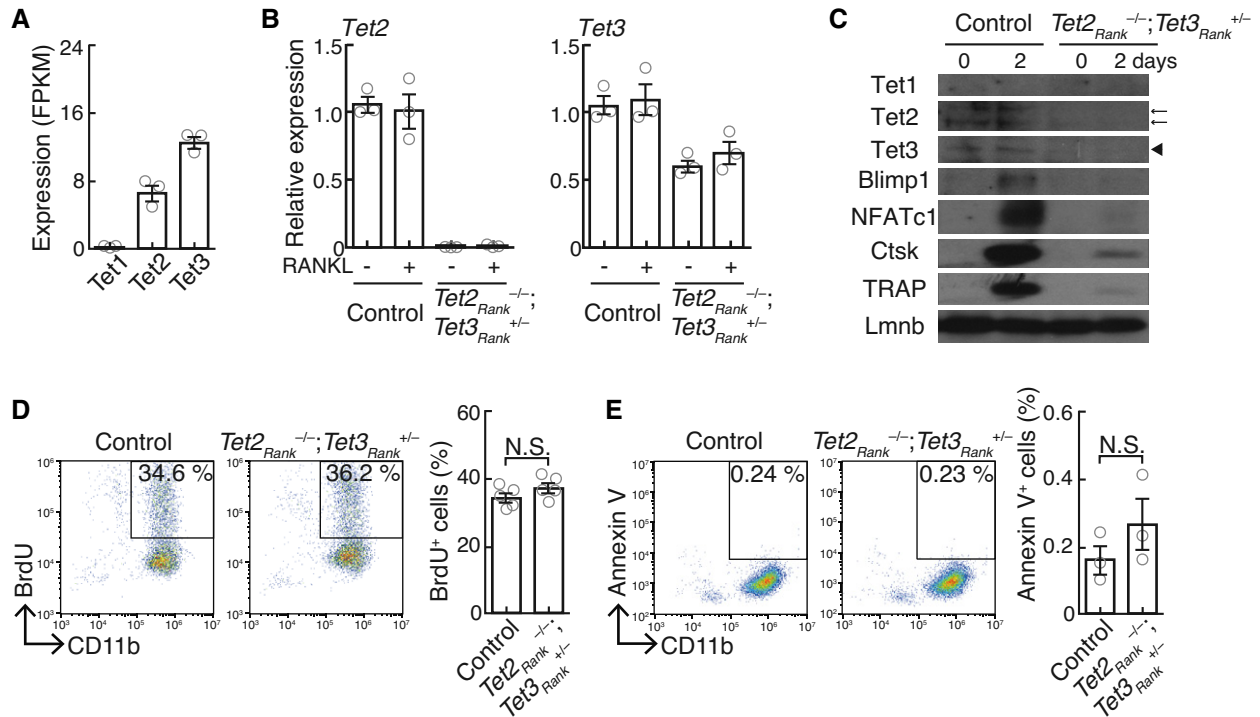

**Figure EV3. Loss-of-function effect of *Tet2* and *Tet3* on cell proliferation, survival, and differentiation.**

- A mRNA expression of *Tet1*, *Tet2*, and *Tet3* in BMMs stimulated with RANKL for 0 and 2 days (RNA-seq analysis;  $n = 3$  biological replicates). Data denote mean  $\pm$  s.e.m.
- B mRNA expression of *Tet2* and *Tet3* in control- and *Tet2*<sup>-/-</sup>; *Tet3*<sup>+/-</sup>-derived BMMs cultured in the absence and presence of RANKL for 2 days (quantitative RT-PCR analysis;  $n = 3$  biological replicates). Data denote mean  $\pm$  s.e.m.
- C Protein expression in control- and *Tet2*<sup>-/-</sup>; *Tet3*<sup>+/-</sup>-derived BMMs cultured in the absence and presence of RANKL for 2 days. Arrows and arrowhead indicate Tet2 and Tet3 proteins, respectively.
- D, E Percentage of BrdU-labeled CD11b<sup>+</sup> BMMs (D) and Annexin V<sup>+</sup> CD11b<sup>+</sup> BMMs (E) derived from control- and *Tet2*<sup>-/-</sup>; *Tet3*<sup>+/-</sup> mice. Data denote mean  $\pm$  s.e.m. NS, not significant ( $n = 5$  (D) and  $n = 3$  (E) biological replicates; t-test).

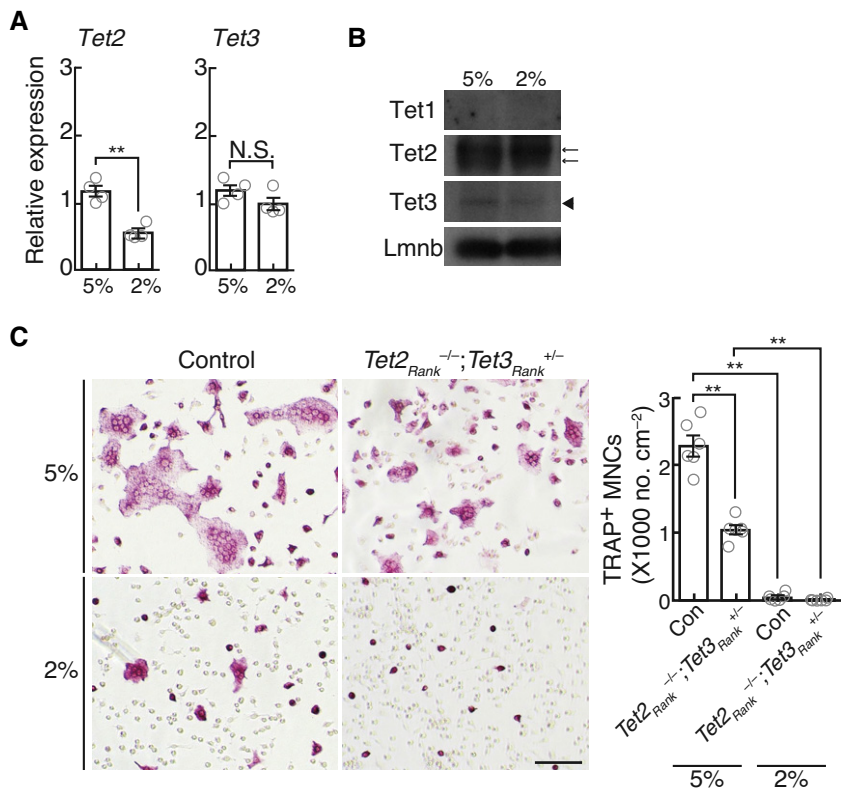

**Figure EV4. Effect of hypoxia on the expression of Tet2 and Tet3, and osteoclast differentiation.**

**A** mRNA expression of *Tet2* and *Tet3* in BMMs stimulated with RANKL for 2 days under 5% and 2% oxygen. Data denote mean ± s.e.m. \*\**P* < 0.01; NS, not significant (*n* = 4 biological replicates; *t*-test).

**B** Protein expression of Tet1, Tet2, and Tet3 in BMMs stimulated with RANKL for 2 days under 5% and 2% oxygen. Arrows and arrowhead indicate Tet2 and Tet3 proteins, respectively.

**C** Effect of hypoxia on osteoclastogenesis. TRAP-stained cells (left panel) and the number of TRAP-positive cells with more than three nuclei (right). Scale bar, 100 μm. Data denote mean ± s.e.m. \*\**P* < 0.01 (*n* = 6 biological replicates; ANOVA).

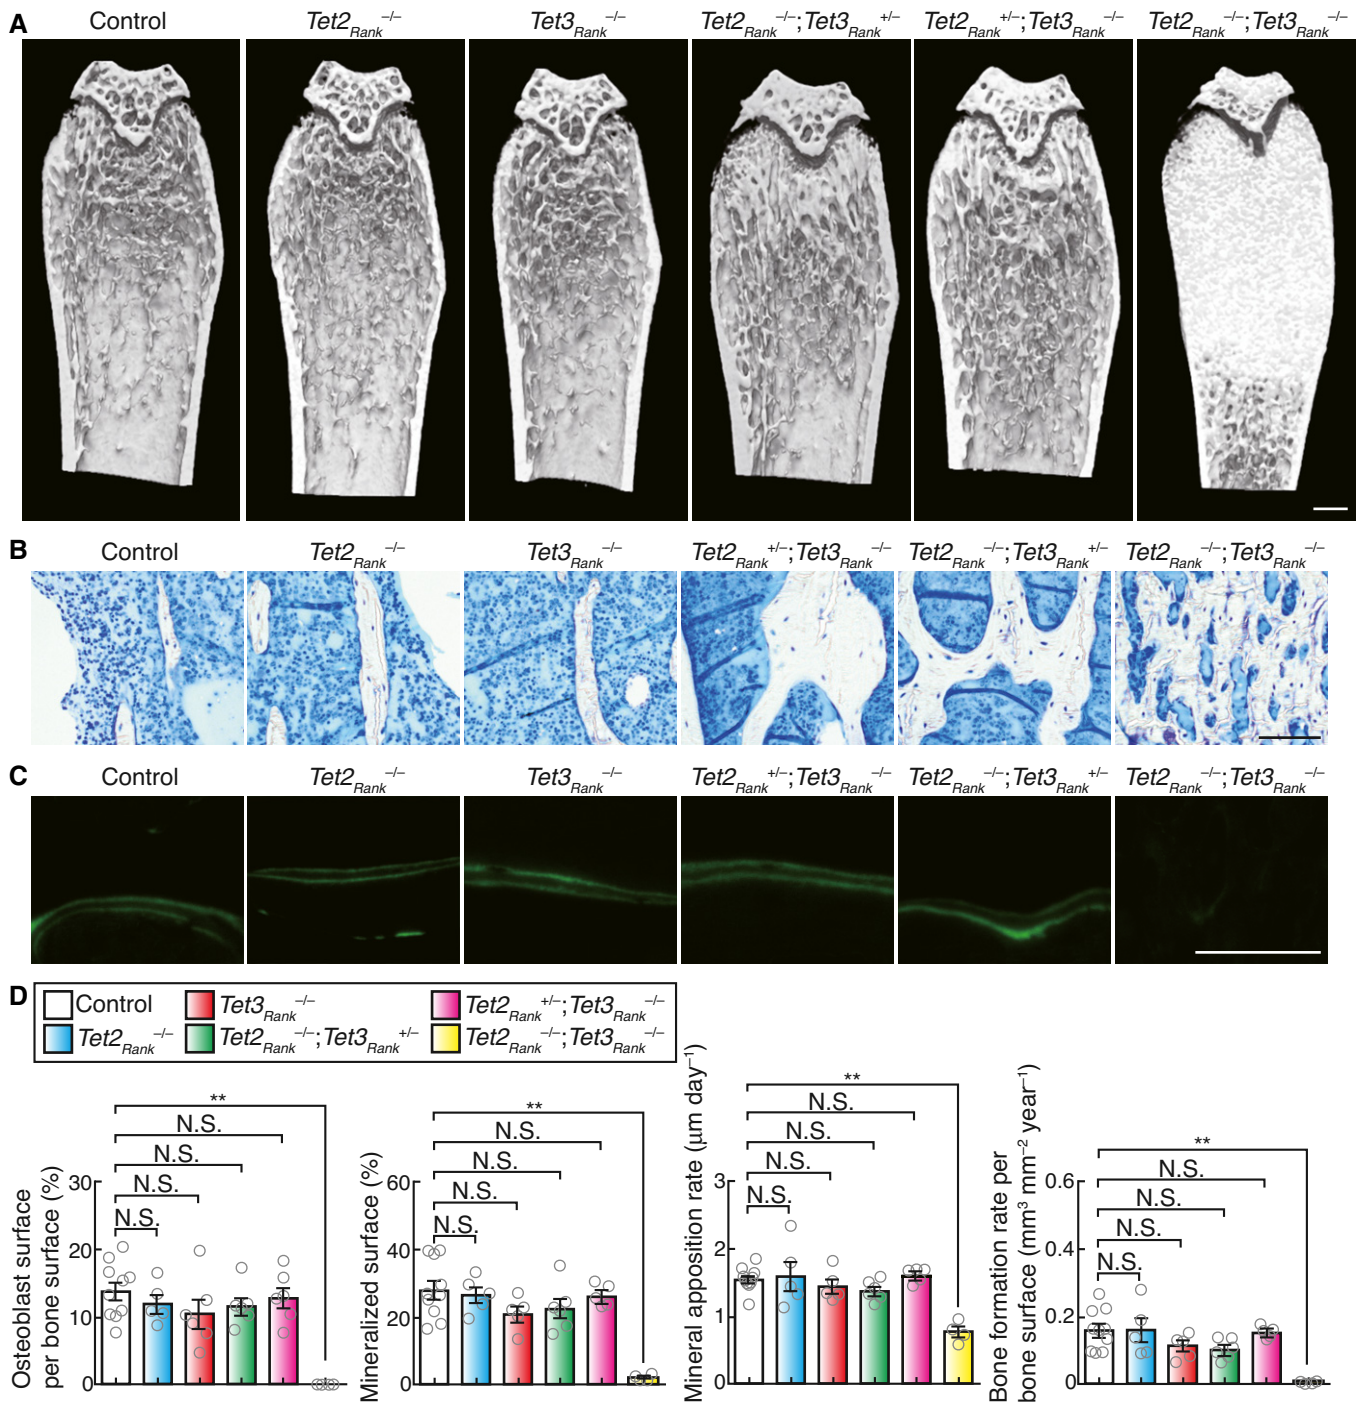

**Figure EV5. Bone phenotype of osteoclast-specific *Tet2*- and *Tet3*-deficient mice.**

**A**  $\mu$ CT analysis of the femurs from 10-week-old control,  $Tet2_{Rank}^{-/-}$ ,  $Tet3_{Rank}^{-/-}$ ,  $Tet2_{Rank}^{-/-}; Tet3_{Rank}^{+/-}$ ,  $Tet2_{Rank}^{+/-}; Tet3_{Rank}^{-/-}$  and  $Tet2_{Rank}^{-/-}; Tet3_{Rank}^{-/-}$  male mice (longitudinal view of the metaphyseal region). Scale, 0.5 mm.

**B, C** Histological analysis of the proximal tibias of 10-week-old control,  $Tet2_{Rank}^{-/-}$ ,  $Tet3_{Rank}^{-/-}$ ,  $Tet2_{Rank}^{-/-}; Tet3_{Rank}^{+/-}$ ,  $Tet2_{Rank}^{+/-}; Tet3_{Rank}^{-/-}$  and  $Tet2_{Rank}^{-/-}; Tet3_{Rank}^{-/-}$  male mice (C, toluidine blue staining; D, calcein labeling). Scale, 100  $\mu$ m.

**D** Osteoblastic parameters of osteoclast-specific *Tet2*- and *Tet3*-deficient mice. Bone morphometric analysis of 10-week-old control ( $n = 10$ ),  $Tet2_{Rank}^{-/-}$  ( $n = 5$ ),  $Tet3_{Rank}^{-/-}$  ( $n = 6$ ),  $Tet2_{Rank}^{-/-}; Tet3_{Rank}^{+/-}$  ( $n = 6$ ),  $Tet2_{Rank}^{+/-}; Tet3_{Rank}^{-/-}$  ( $n = 6$ ), and  $Tet2_{Rank}^{-/-}; Tet3_{Rank}^{-/-}$  ( $n = 4$ ) male mice was performed. Data denote mean  $\pm$  s.e.m. \*\* $P < 0.01$ ; NS, not significant (ANOVA).
